# Supplementary material
Source: PubMed Central journal article supplement (PMC4587440)
Supplement: supp_pp.15.00229_PP2015-00229R1_Supplemental_Material.pdf [file supp_pp.15.00229_PP2015-00229R1_Supplemental_Material.pdf]

## SUPPLEMENTAL FIGURES

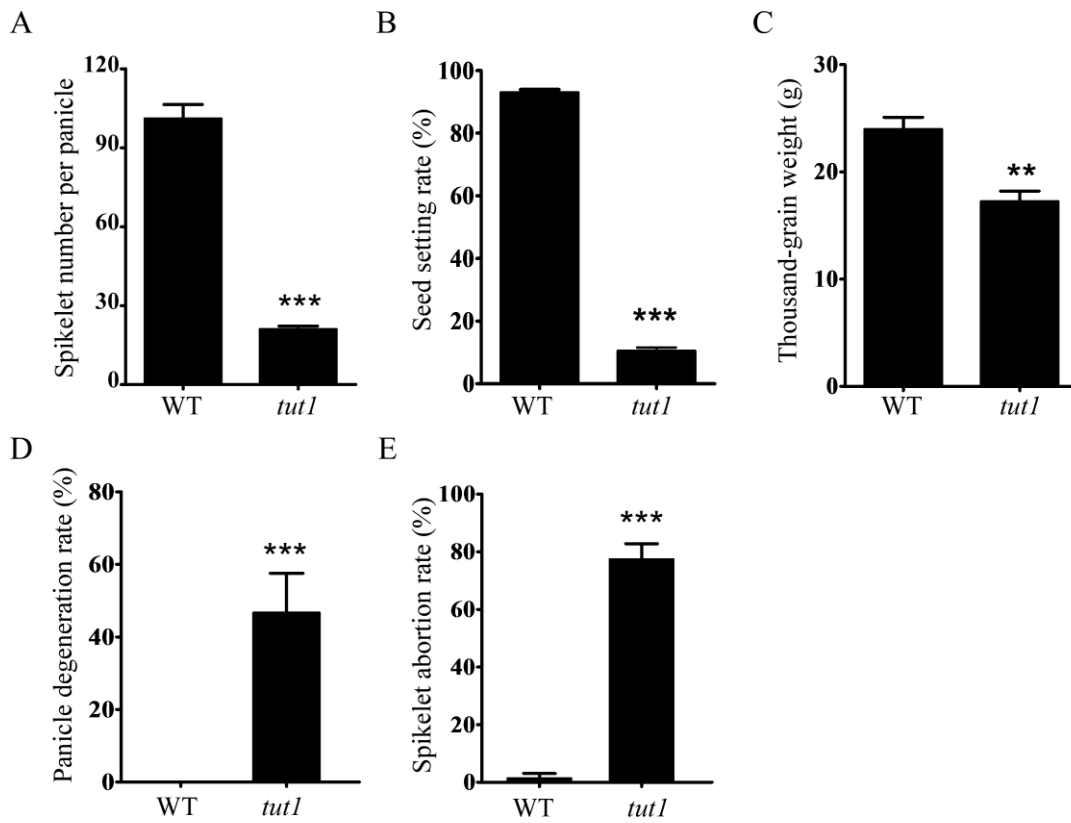

**Supplemental Figure 1.** Quantitation of agronomic traits in wild type and *tut1*.

A, Spikelet number per panicle. B, Seed-setting rate. C, Thousand-grain weight of mature seeds. D, Panicle degeneration percentage. E, Spikelet abortion percentage. More than 20 panicles were used for each analysis. Error bars indicate SD. \*\*\* indicates  $P < 0.01$  (Student's *t*-test).

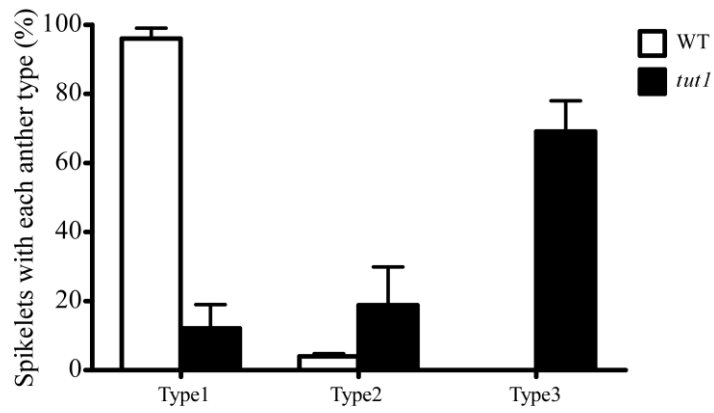

**Supplemental Figure 2.** Quantitation of anther degeneration in wild type and *tut1*. Type 1, Type 2 and Type 3 anthers, as shown in Figure 2E, were analyzed at anther developmental stage 14. Over 40 anthers were used in this statistical analysis. Error bars indicate SD.

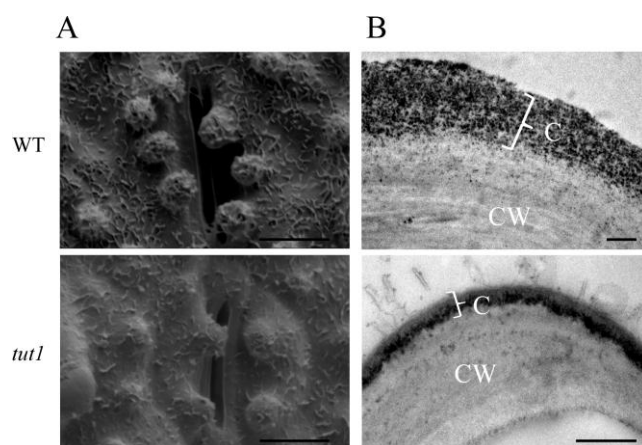

**Supplemental Figure 3.** SEM and TEM examination of cuticle in wild type and *tut1* leaves. A, Observation of wild type and *tut1* leaves stomata circumambient surface by SEM. Mature leaves of wild type and *tut1* were used. Bar = 5 μm. B, Observation of wild type and *tut1* leaf cuticle by TEM. C indicates cuticle, CW indicates cell wall. The middle part of the leaf was selected for TEM. Bar = 0.5 μm.

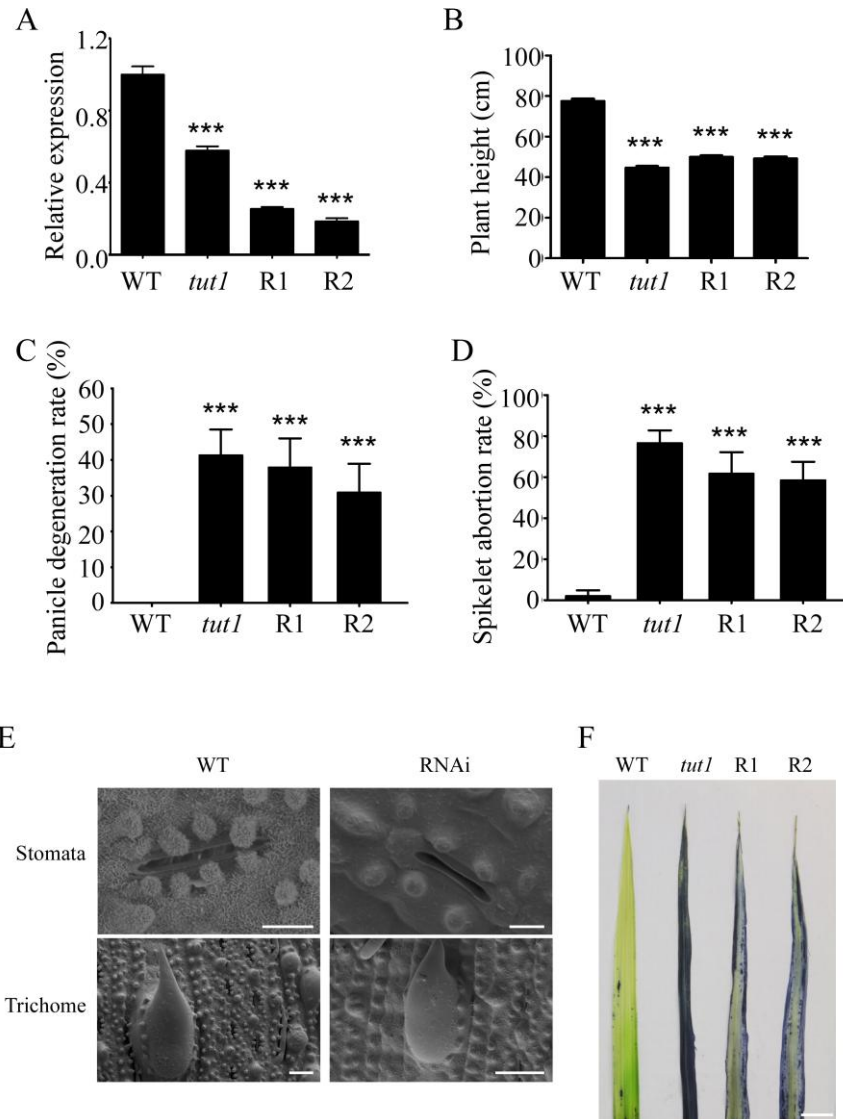

**Supplemental Figure 4.** The phenotypes of *TUT1* RNAi transgenic lines.

A, RT-qPCR analysis of the levels of *TUT1* mRNA in wild type, *tut1*, and RNAi transgenic lines.

B, Plant height in wild type, *tut1*, and RNAi transgenic lines (R1 and R2) at ripening stage. More than 120 plants were used.

C, Panicle abortion percentage of wild type and *tut1* at ripening stage. More than 50 panicles were used.

D, Spikelet abortion percentage of wild type and *tut1* at ripening stage. More than 50 panicles were used.

E, Observation of stomata and trichome in wild type and representative RNAi transgenic line with SEM. Bars = 5  $\mu$ m (top two) and 20  $\mu$ m (bottom two).

F, NBT staining to show ROS in wild type, *tut1* and two RNAi transgenic lines.

Bars = 1 cm. For graphs, error bars indicate SD and \*\*\* indicates  $P < 0.01$  (Student's  $t$  -test).

A

```

TUT1  NPLRVEFRVNEVGLDPLVGGGGGGGGGGGGVGGV...AAAKKGEEAEKALLEGVAAGVGLRQLGDIAE...FADVFDHDE
OscSCAR1  WRYGIRNEYGLSDPEL YAP GEK...DDPEALLEGVAAGVGLRQLGDIAE...FAAEI FHDHDE
OscSCAR2  NPLRHEVGNVYSGGREYRR ANQ...HDEPAMLDGVAAGVGLRQLGDIAE...FAACVHGQYD
OscSCAR3  MGRGRGNDDDG...KTVVDFEVAI RQLGDIAE...FAAEI FHDHDE
DmsSCAR1  MRYLPSVTDNKPALLEG...QSKDCIWDIMTSITVGIHQIIMVAH...SNSTPTALAN
AetSCAR1  STTI TNVKTQVGDPCVYGGAG AKRGVGVAGA...AGEAEFKALLEGVAAGVGLRQLGDIAE...FAAEI FHDHDE
SbSCAR1  NPLRVEFRVNEVGLDPLVGGGGGGGGVGGAAVGTGAAGKRGAAAGAEKALLEGVAAGVGLRQLGDIAE...FAAEI FHDHDE
SbSCAR2  NPLRVEFRVNEVGLDPEYGGGAAAAG...AAAVAGNRGATAAAAAGEEPAKALLEGVAAGVGLRQLGDIAE...FAAEI FHDHDE
ZmSCAR1  MRHGRNEYGLADPEVYAAPGEE...DDPEALLEGVAAGVGLRQLGDIAE FVGHG...SPSSLWLLI HTEL YRGI YRFAE I FHDHDE
ZmSCAR2  NPLSRHTVRSYAEVGGDRYRG ADQ...HDEPAMLDGVAAGVGLRQLGDIAE...FAAEI FHDHDE
ZmSCAR4  MPTTRSSRASPWCASSTSSASSETS QS AFVLESLLR...SLASVSYTSCCLASNRIEMTPTNTSTG...MRRLAEFVFDQDQ
ZmSCAR5  NPLRVEFRVNEVGLDPEYGGGAAAAG...AAATAAAGEEPAKALLEGVAAGVGLRQLGDIAE FVGHG...HTRFAAEI FHDHDE
ZmSCAR6  NPLSRHTVRSYAEVGGDRYRG ADQ...HDEPAMLDGVAAGVGLRQLGDIAE...FAAEI FHDHDE
AiscAR1  NPLVRLCYRNVYGLGKELHTKVD...REDPKALLDVAVSEVGLRQLGDIAE...FAAEI FHDHDE
AiscAR2  NPLTRVQSRNEVGLADPEYCAADK...DDPEALLEGVAAGVGLRQLGDIAE...FAAEI FHDHDE
AiscAR3  MPRNVYGNQSVYRND...REDPKALLDVAVTEVGLRQLGDIAE...FAAEI FHDHDE
AiscAR4  NALTRVQI RNEYVGLADKEL YQSADK...EDPEALLEGVAAGVGLRQLGDIAE...FAAEI FHDHDE
AiscAR5  NPLVRFKIRNELSGPELQRSASVE...DEEPKALLDVAVAGI IGLRQLGDIAE...FAAEI FHDHDE
HsWAVE1  NPLKRNIDPRHLCHTALP...RGIKNELEKNTNLSANIRQLSSSKY...FAAEI FHDHDE
MmWAVE1  NPLKRNIDPRHLCHTALP...RGIKNELEKNTNLSANIRQLSSSKY...FAAEI FHDHDE
CeWVE-1  NPLTRAVSPVNL SRGTI PS...TIHRDEQCTNINIANVRLQSSSKH...FAAEI FHDHDE
DmsSCAR  NPLPKRSIEPVHVASVYQC...DELQSVELITNTNTITNIRQLSSSKH...FAAEI FHDHDE
BdSCAR  NPLRVEFRVNEVGLDPEYGGGGGAGKRG...GGEAEKALLEGVAAGVGLRQLGDIAE...FAAEI FHDHDE

```

```

TUT1  QVITTSARGKRLTRVNCIEAALPSLEKAVNKSKE...IHFYVPSDWHACLKDEQNHLL...SSDLPRFMSVVEGRDPPRYLIDKFDNAAGACSRHSRSPYFKKAVDMRADKTGNFQREKRSCKI KRK
OscSCAR1  VASRGHGLMRLQCLEAEFPFAVEKAIISQSD...SNYPDDGVEMHNLQIQDNIIT...QGDPRI LSVYEGRGPPELIDKFDNAAGACSRHSRSPYFKKAVDMRADKTGNFQREKRSCKI KRK
OscSCAR2  VMTSARGHGLMRLQCLEAEPLVEDKSDCHTDYL...YVASNRGEMHNSRPLESGVVT...GGDPRI LSVYEGRGPPELIDKFDNAAGACSRHSRSPYFKKAVDMRADKTGNFQREKRSCKI KRK
OscSCAR3  QVALBITRRQALRNHIDHAPPVAVAPQDSSS...FFCHKDYVLFVANSI GRVWRANILKQLVAGGNSDPIIFRIHRGRGPPNLSLDKVDADGEACLKRITPFFTSHSACSTLHQRIHAKQPPKLLLE
DmsSCAR1  DANVTQIEKLSGRLPIIGSIPFEDYRNTSISD...TNSKPPAEFHADNSRCHFT...HASIASIATYELRGPPELIDKFDNAAGACSRHSRSPYFKKAVDMRADKTGNFQREKRSCKI KRK
AetSCAR1  QVITTSARGKRLTRVNCIEAALPSLEKAVNKSKE...IHFAYVPSDWHACLKDEQNHLL...SSDLPRFMSVVEGRDPPRYLIDKFDNAAGACSRHSRSPYFKKAVDMRADKTGNFQREKRSCKI KRK
SbSCAR1  QVITTSARGKRLTRVNCIEAALPSLEKAVNKSKE...IHFAYVPSDWHACLKDEQNHLL...SSDLPRFMSVVEGRDPPRYLIDKFDNAAGACSRHSRSPYFKKAVDMRADKTGNFQREKRSCKI KRK
SbSCAR2  QVITTSARGKRLTRVNCIEAALPSLEKAVNKSKE...IHFAYVPSDWHACLKDEQNHLL...SSDLPRFMSVVEGRDPPRYLIDKFDNAAGACSRHSRSPYFKKAVDMRADKTGNFQREKRSCKI KRK
ZmSCAR1  EAMVATASRGHGLMRLQCLEAEFPFAVEKAIISQTE...SNYPDDGVEMHNSVQLKQNTIT...GGDPRI LSVYEGRGPPELIDKFDNAAGACSRHSRSPYFKKAVDMRADKTGNFQREKRSCKI KRK
ZmSCAR2  VMTSARGHGLMRLQCLEAEPLVEDKSDCHTDYL...HVASNRGEMHNSRPLESGVVT...GGDPRI LSVYEGRGPPELIDKFDNAAGACSRHSRSPYFKKAVDMRADKTGNFQREKRSCKI KRK
ZmSCAR4  QVITTSARGKRLTRVNCIEAALPSLEKAVNKSKE...IHFAYVPSDWHACLKDEQNHLL...SSDLPRFMSVVEGRDPPRYLIDKFDNAAGACSRHSRSPYFKKAVDMRADKTGNFQREKRSCKI KRK
ZmSCAR5  QVITTSARGKRLTRVNCIEAALPSLEKAVNKSKE...IHFAYVPSDWHACLKDEQNHLL...SSDLPRFMSVVEGRDPPRYLIDKFDNAAGACSRHSRSPYFKKAVDMRADKTGNFQREKRSCKI KRK
ZmSCAR6  VMTSARGHGLMRLQCLEAEPLVEDKSDCHTDYL...HVASNRGEMHNSRPLESGVVT...GGDPRI LSVYEGRGPPELIDKFDNAAGACSRHSRSPYFKKAVDMRADKTGNFQREKRSCKI KRK
AiscAR1  EAMVATASRGHGLMRLQCLEAEFPFAVEKAIISQTE...SNYPDDGVEMHNSVQLKQNTIT...GGDPRI LSVYEGRGPPELIDKFDNAAGACSRHSRSPYFKKAVDMRADKTGNFQREKRSCKI KRK
AiscAR2  VMTSARGHGLMRLQCLEAEPLVEDKSDCHTDYL...HVASNRGEMHNSRPLESGVVT...GGDPRI LSVYEGRGPPELIDKFDNAAGACSRHSRSPYFKKAVDMRADKTGNFQREKRSCKI KRK
AiscAR3  EAMVATASRGHGLMRLQCLEAEFPFAVEKAIISQTE...SNYPDDGVEMHNSVQLKQNTIT...GGDPRI LSVYEGRGPPELIDKFDNAAGACSRHSRSPYFKKAVDMRADKTGNFQREKRSCKI KRK
AiscAR4  QVITTSARGKRLTRVNCIEAALPSLEKAVNKSKE...IHFAYVPSDWHACLKDEQNHLL...SSDLPRFMSVVEGRDPPRYLIDKFDNAAGACSRHSRSPYFKKAVDMRADKTGNFQREKRSCKI KRK
AiscAR5  EAMVATASRGHGLMRLQCLEAEFPFAVEKAIISQTE...SNYPDDGVEMHNSVQLKQNTIT...GGDPRI LSVYEGRGPPELIDKFDNAAGACSRHSRSPYFKKAVDMRADKTGNFQREKRSCKI KRK
HsWAVE1  EAMVATASRGHGLMRLQCLEAEFPFAVEKAIISQTE...SNYPDDGVEMHNSVQLKQNTIT...GGDPRI LSVYEGRGPPELIDKFDNAAGACSRHSRSPYFKKAVDMRADKTGNFQREKRSCKI KRK
MmWAVE1  EAMVATASRGHGLMRLQCLEAEFPFAVEKAIISQTE...SNYPDDGVEMHNSVQLKQNTIT...GGDPRI LSVYEGRGPPELIDKFDNAAGACSRHSRSPYFKKAVDMRADKTGNFQREKRSCKI KRK
CeWVE-1  EAMVATASRGHGLMRLQCLEAEFPFAVEKAIISQTE...SNYPDDGVEMHNSVQLKQNTIT...GGDPRI LSVYEGRGPPELIDKFDNAAGACSRHSRSPYFKKAVDMRADKTGNFQREKRSCKI KRK
DmsSCAR  EAMVATASRGHGLMRLQCLEAEFPFAVEKAIISQTE...SNYPDDGVEMHNSVQLKQNTIT...GGDPRI LSVYEGRGPPELIDKFDNAAGACSRHSRSPYFKKAVDMRADKTGNFQREKRSCKI KRK
BdSCAR  QVITTSARGKRLTRVNCIEAALPSLEKAVNKSKE...IHFAYVPSDWHACLKDEQNHLL...SSDLPRFMSVVEGRDPPRYLIDKFDNAAGACSRHSRSPYFKKAVDMRADKTGNFQREKRSCKI KRK

```

B

```

          α-helix
          * * * *
TUT1  KNLDEREELQQR...SKTFNLRRTNASKNTSSP...TTANSSRVAIEKANARCAVA...SDEGGDDNSWDI...
OscSCAR1  SKPNERNLQQR...NITFENRQVSAKQPTI RTPPRASTRNLKAAI...IEKANARCAVA...SDEGEGDDNSWSD...
OscSCAR2  RLSEGRKPELQQR...NITFENRQVSAKQPTI RTPPRASTRNLKAAI...IEKANARCAVA...SDEGEGDDNSWSD...
DmsSCAR1  NGLDEREELQQR...SKTFNLRRTNASKNTSSP...STAGSNRVAIEKANARCAVA...SDEGGDDNSWDI...
AetSCAR1  NSLDEREELQQR...SKTFNLRRTNASKNTSSP...STAGSNRVAIEKANARCAVA...SDEGGDDNSWDI...
SbSCAR1  KSLDEREELQQR...SKTFNLRRTNASKNTSSP...STAGSNRVAIEKANARCAVA...SDEGGDDNSWDI...
SbSCAR2  KSLDEREELQQR...SKTFNLRRTNASKNTSSP...STAGSNRVAIEKANARCAVA...SDEGGDDNSWDI...
ZmSCAR1  KPNERNLQQR...NITFENRQVSAKQPTI RTPPRASTRNLKAAI...IEKANARCAVA...SDEGEGDDNSWSD...
ZmSCAR2  MLADEKNTLEQQR...NITFENRQVSAKQPTI RTPPRASTRNLKAAI...IEKANARCAVA...SDEGEGDDNSWSD...
ZmSCAR4  NI LDEREELQQR...KDI AISSRKAPASRA SSVHTG...TGSPTNVAIEKANARCAVA...SDEGEGDDNSWSD...
ZmSCAR5  KSLDEREELQQR...SKTFNLRRTNASKNTSSP...STAGSNRVAIEKANARCAVA...SDEGEGDDNSWSD...
ZmSCAR6  KLADEKNTLEQQR...NITFENRQVSAKQPTI RTPPRASTRNLKAAI...IEKANARCAVA...SDEGEGDDNSWSD...
AiscAR1  TNEITAGDRLQQR...TKCFNRRVVRTKSSSETT...MNTNVAIEKANARCAVA...SDEGEGDDNSWSD...
AiscAR2  SKDDKDSLEQQR...NITFENRQVSAKQPTI RTPPRASTRNLKAAI...IEKANARCAVA...SDEGEGDDNSWSD...
AiscAR3  KETITGDLQQR...TKCFNRRVVRTKSSSETT...MNTNVAIEKANARCAVA...SDEGEGDDNSWSD...
AiscAR4  ARVDEKNTLEQQR...NITFENRQVSAKQPTI RTPPRASTRNLKAAI...IEKANARCAVA...SDEGEGDDNSWSD...
HsWAVE1  VLSARVSELEA...KGRKRVVEQREQA AKHER...IENDVAIEKANARCAVA...SDEGEGDDNSWSD...
MmWAVE1  VLSARVSELEA...KGRKRVVEQREQA AKHER...IENDVAIEKANARCAVA...SDEGEGDDNSWSD...
CeWVE-1  KGPVARSDELEA...KGRKRVVEQREQA AKHER...IENDVAIEKANARCAVA...SDEGEGDDNSWSD...
DmsSCAR  FHPNDKAR...KGRKRVVEQREQA AKHER...IENDVAIEKANARCAVA...SDEGEGDDNSWSD...
BdSCAR  KASARVSELEA...KGRKRVVEQREQA AKHER...IENDVAIEKANARCAVA...SDEGEGDDNSWSD...

```

**Supplemental Figure 5.** Amino acid sequence alignment of TUT1 and other WAVE/SCAR

family proteins.

A, Sequence alignment of the SHDs from different species, constructed using DNAMAN software. Amino acids identical in all sequences (black), amino acids sequence with > 75% identity (dark gray), and with > 50% identity (light gray) are indicated. B, Sequence alignment of the VCA domain from different species, constructed using DNAMAN software. Residues that are essential for actin binding are indicated with asterisks. The α-helix is shown above the sequences, as previously described (Paunola et al., 2002). Amino acids sequence identity is

indicated as in A. The G-actin binding region (WH2), connector region (Connector) and acidic region (Acidic) are labeled. W indicates the conserved tryptophan.

A

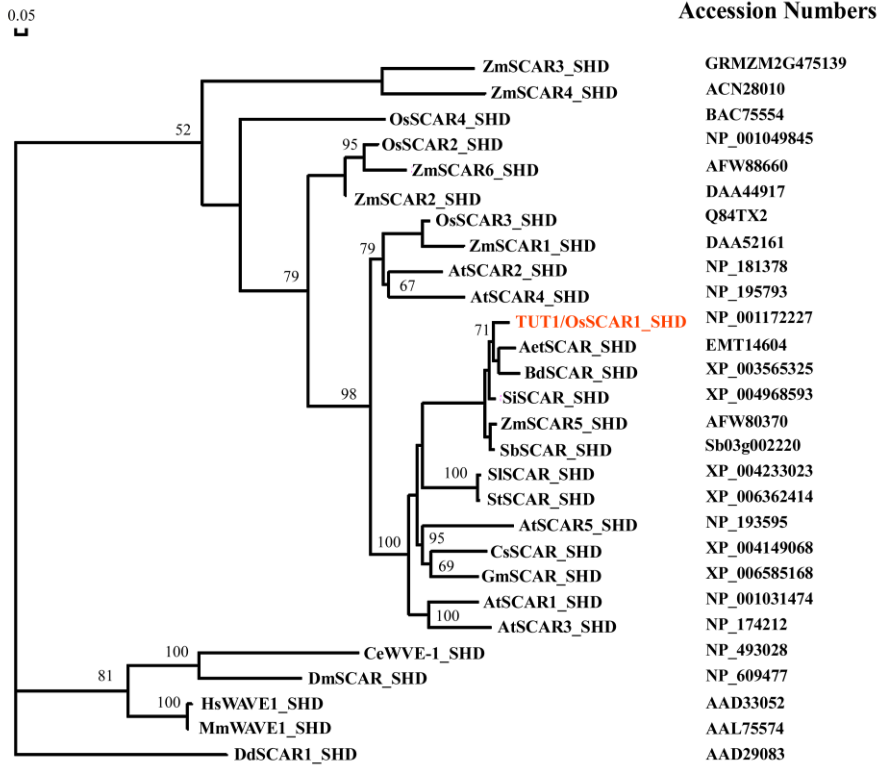

B

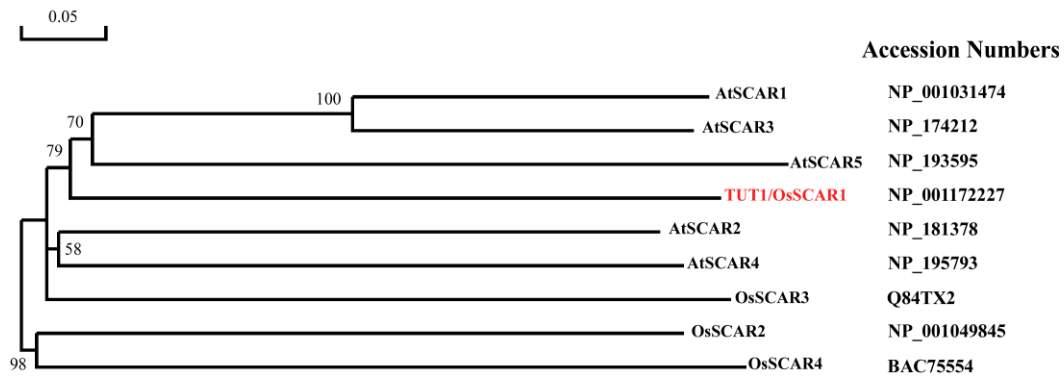

**Supplemental Figure 6.** Phylogenetic tree of SHD of SCAR/WAVE proteins from Arabidopsis and rice.

A, Phylogenetic tree of the SHD of TUT1 and its homologous proteins in different species. The phylogenetic tree was constructed using DNAMAN software with 1000 bootstrapping trials.

The numbers on the branch sites indicate bootstrapping values. TUT1 is shown in red.



Accession numbers are shown. The tree was constructed using the distance method with maximum likelihood. Bootstrapping values over 50% and scale bar are shown in the phylogenetic tree. Species are as indicated: *Aegilops tauschii* (Aet), *Arabidopsis thaliana* (At), *Brachypodium distachyon* (Bd), *Caenorhabditis elegans* (Ce), *Cucumis sativus* (Cs), *Dictyostelium discoideum* (Dd), *Drosophila melanogaster* (Dm), *Glycine max* (Gm), *Homo sapiens* (Hs), *Mus musculus* (Mm), *Oryza sativa* (Os), *Setaria italica* (Si), *Solanum lycopersicum* (Sl), *Solanum tuberosum* (St), *Sorghum bicolor* (Sb), *Zea mays* (Zm). B, Phylogenetic tree of SCAR/WAVE proteins in Arabidopsis and rice. The phylogenetic tree was constructed using DNAMAN software with 1000 bootstrapping trials. The numbers on the branch sites indicate bootstrapping values. TUT1 is shown in red. Accession numbers are shown. The tree was constructed using the distance method with maximum likelihood. Bootstrapping values over 50% and scale bar are shown in the phylogenetic tree.

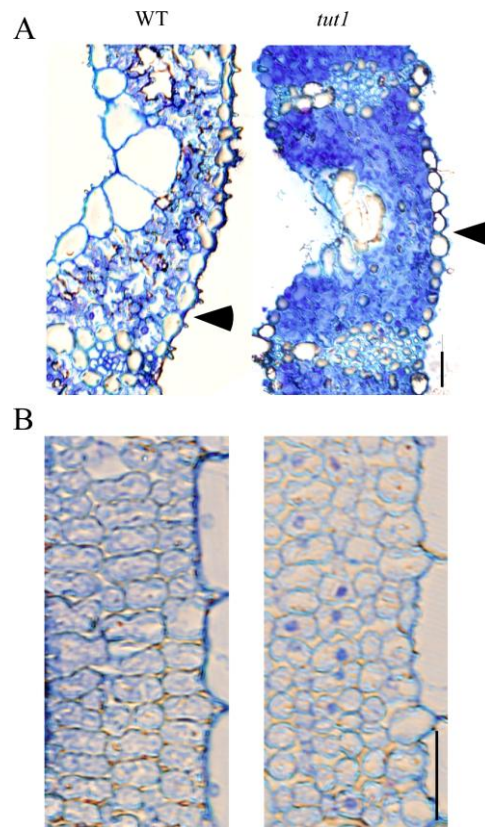

**Supplemental Figure 7.** Analysis of mature leaves of wild type and *tut1* by light microscopy. A, Cross sections observation of mature leaves of wild type and *tut1*. The black arrows showed epidermal cell wall at two cells junction of mature leaves. Bar = 200  $\mu\text{m}$ . B, Paradermal sections observation of mature leaves of wild type and *tut1*. The sections were stain with Toluidine blue. Bar = 200  $\mu\text{m}$ .

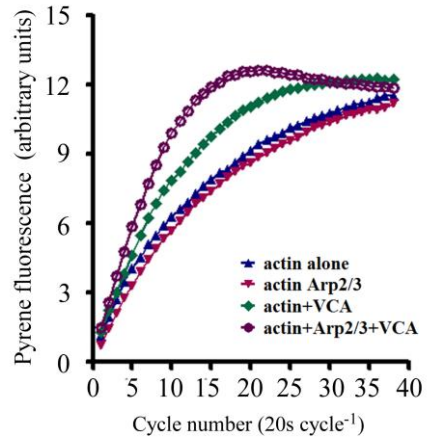

**Supplemental Figure 8.** Activation analysis of TUT1-VCA domain *in vitro*.

The VCA domain of TUT1 could activate bovine Arp2/3. Actin (5% pyrene labeled) with or without Arp2/3 and VCA recombinant protein was added to polymerization reaction system and the kinetics of assembly monitored by fluorimetry. Pyrene fluorescence shows the degree of G-actin assembly into filaments. Conditions: actin alone (blue line), actin and Arp2/3 proteins (red line), actin and VCA recombinant protein (green line), and actin, Arp2/3 and VCA recombinant protein (purple line).

**Table S1: Primers used in this study.**

| <b>Primer</b> | <b>Primer sequence (5' to 3')</b> | <b>Experiment</b> |
|---------------|-----------------------------------|-------------------|
| P23_F         | GTAGTTTCTGGCAGAGGAGG              | Fine mapping      |
| P23_R         | AACAGCGATAGTATGGTTGC              | Fine mapping      |
| P10A_F        | GAGGATTCCGAGAAGTAGGG              | Fine mapping      |
| P10A_R        | ACGAAAGATATCAGCCAAAA              | Fine mapping      |
| P18_F         | AATATAATGACACTAGCCGT              | Fine mapping      |
| P18_R         | CTTGCTTACTCAGTTGCTCT              | Fine mapping      |
| P5_F          | GCTGAGTGGCGACAATGATGA             | Fine mapping      |
| P5_R          | ATGACGAAGTAAAACCCGACC             | Fine mapping      |
| P22_F         | TTCTCTTAAAACCTCTCGCTG             | Fine mapping      |
| P22_R         | CTTTGGTCACATTATTCCTTG             | Fine mapping      |
| P5#A_F        | CAGGTGAAGCGCCATTGAT               | Fine mapping      |

|                |                                        |              |
|----------------|----------------------------------------|--------------|
| P5#A_R         | GCATTGCATTGCAAGATGC                    | Fine mapping |
| TUT1_RT-qPCR_F | TGATTTTCCCAGTTTGTCAAGTG                | RT-qPCR      |
| TUT1_RT-qPCR_R | GGATGAGGATTAGCTGTATAGCC                | RT-qPCR      |
| GAPDH_F        | AAGCCAGCATCCTATGATCAGATT               | RT-qPCR      |
| GAPDH_R        | CGTAACCCAGAATACCCTTGAGTTT              | RT-qPCR      |
| GUS_F          | CTGCAGTCTGTGGAAGGAGCGGAACT             | TUT1:GUS     |
| GUS_R          | GGATCCGCTTGTACTGGTCGGAGGC              | TUT1:GUS     |
| RNAi_F         | GGGGTACCACTAGTCGGAGACTGTAG<br>TGAAGGC  | pTCK303-TUT1 |
| RNAi_R         | CGGGATCCGAGCTCCCCACAAAACCTG<br>CTGGTAA | pTCK303-TUT1 |
| VCA_F          | CGGGATCCCCAGTACACACTCCTGTTC<br>A       | pGEX-VCA     |
| VCA_R          | GCGTCGACTCATATATCACTCCAACCTAT<br>CATCA | pGEX-VCA     |
| TUT1_OE_F      | GTCGACATGCCGCTGGTGAGGTTCTGA            | UBI:TUT1     |
| TUT1_OE_R      | CCCGGGTATATCACTCCAACCTATCATCA          | UBI:TUT1     |

## SUPPLEMENTAL METHODS

### Actin Polymerization

For protein purification, the region encoding the last 153 amino acids of TUT1, including the VCA domain, was cloned using the gene-specific primers VCA\_F and VCA\_R. The TUT1 VCA domain was cloned into the GST fusion vector pGEX4T-1 (GE Healthcare) using the *Bam*HI and *Sa*II sites. The expression and purification of GST-VCA recombinant protein was performed according to the manufacturer's instructions.

Polymerization analyses were performed using the Actin Polymerization Biochem Kit (Denver, CO, USA) and performed according to the manufacturer's instructions. Pyrene fluorescence was detected using a spectrofluorimeter. For the details of this method, see (Mullins and Machesky, 2000; Basu et al., 2005; Zhang et al., 2008).

### LITERATURE CITED

- Basu D, Le J, El-Essal Sel-D, Huang S, Zhang C, Mallery EL, Koliantz G, Staiger CJ, Szymanski DB** (2005) DISTORTED3/SCAR2 is a putative *Arabidopsis* WAVE complex subunit that activates the Arp2/3 complex and is required for epidermal morphogenesis. *Plant Cell* **17**: 502-524
- Mullins RD, Machesky LM** (2000) Actin assembly mediated by Arp2/3 complex and WASP family proteins. *Methods Enzymol* **325**: 214-237
- Paunola, E., Mattila, P.K., and Lappalainen, P.** (2002). WH2 domain: a small, versatile adapter for actin monomers. *Febs Lett* **513**: 92-97.
- Zhang C, Mallery EL, Schlueter J, Huang SJ, Fan YR, Brankle S, Staiger CJ, Szymanski DB** (2008) *Arabidopsis* SCARs function interchangeably to meet actin-related protein 2/3 activation thresholds during morphogenesis. *Plant Cell* **20**: 995-1011
